# Supplementary material for: Expression analysis and in silico characterization of intronic long noncoding RNAs in renal cell carcinoma: emerging functional associations
Source: PubMed Central journal article supplement (PMC3834536; doi:10.1186/1476-4598-12-140), 2013-11-15

Subgroup III: All cis correlations - GO enrichment analysis - Developmental process

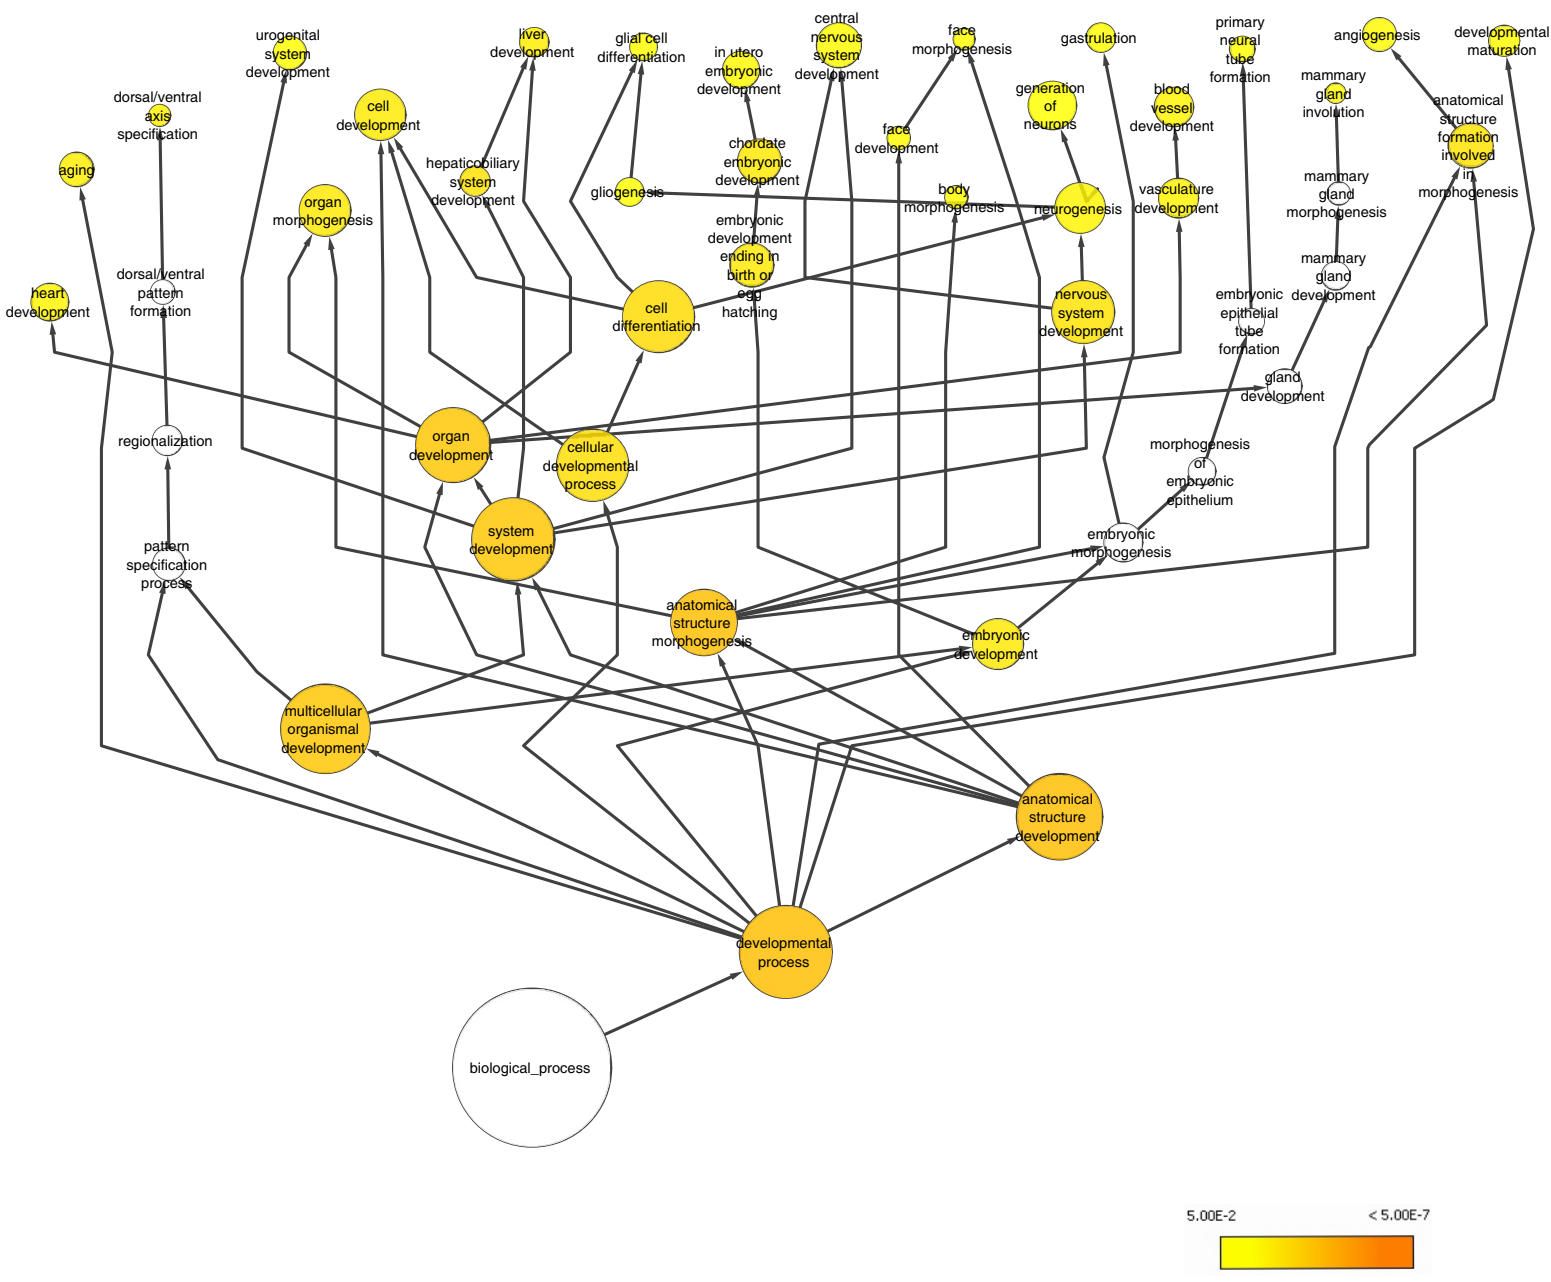

Supplement: 1476-4598-12-140-S9.pdf [file 1476-4598-12-140-S9.pdf]
